# Supplementary material for: FBXW7 regulates DISC1 stability via the ubiquitin-proteosome system
Source: PubMed Central journal article supplement (PMC5984089; doi:10.1038/mp.2017.138), 2017-07-20

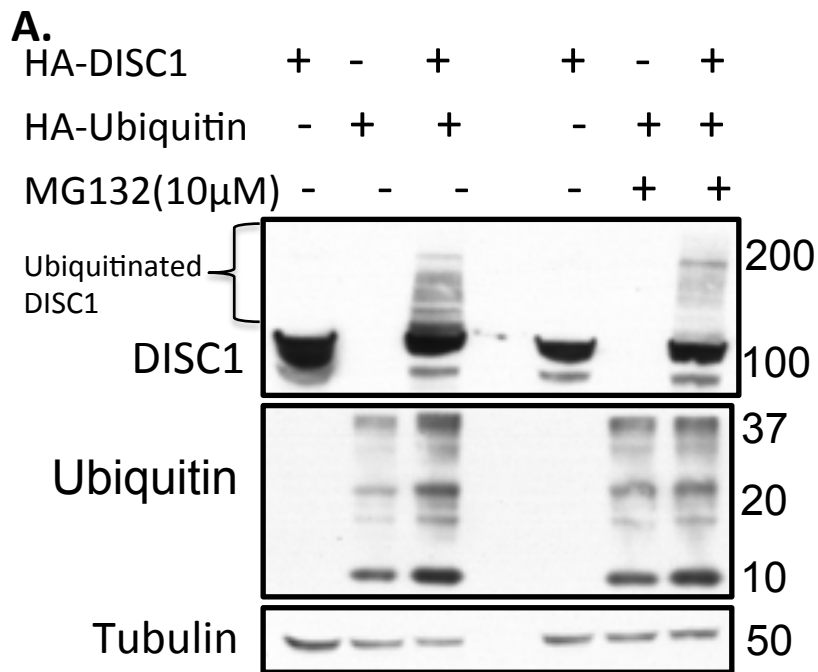

**C.**

| Lysine | Peptide              |
|--------|----------------------|
| K372   | LQEDAVENDDYDKAETLQQR |
| K45    | LGSVKEDYNR           |
| K18    | SLNLSLKEITTK         |
| K13    | SLNLSLKEITTK         |

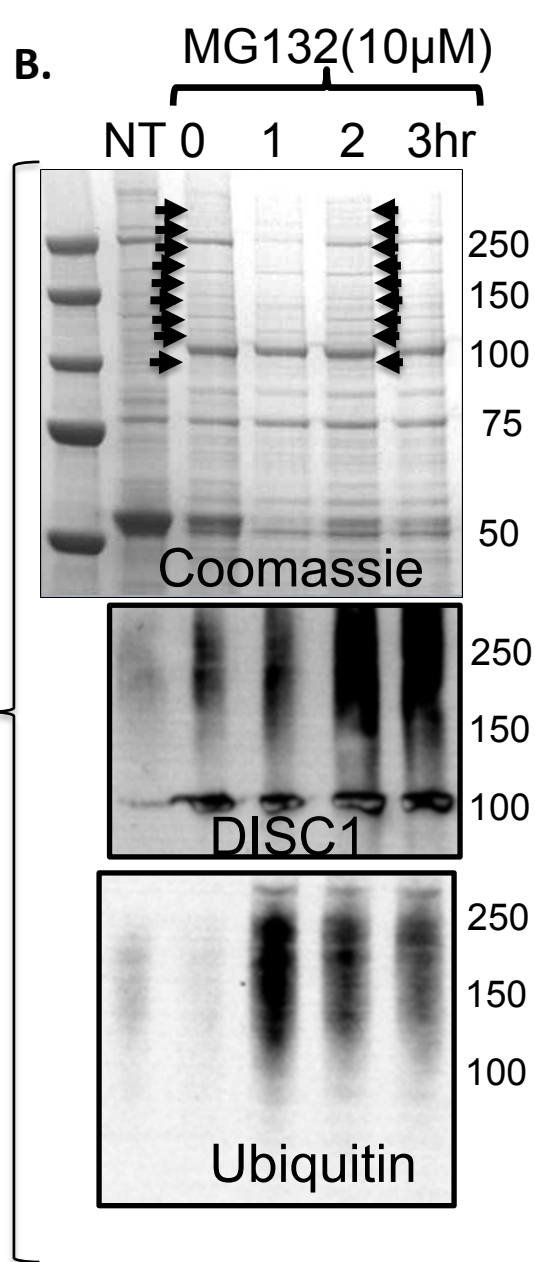

Supplement: mp2017138x1.pdf [file mp2017138x1.pdf]
