# Supplementary material for: FBXW7 regulates DISC1 stability via the ubiquitin-proteosome system
Source: PubMed Central journal article supplement (PMC5984089; doi:10.1038/mp.2017.138), 2017-07-20

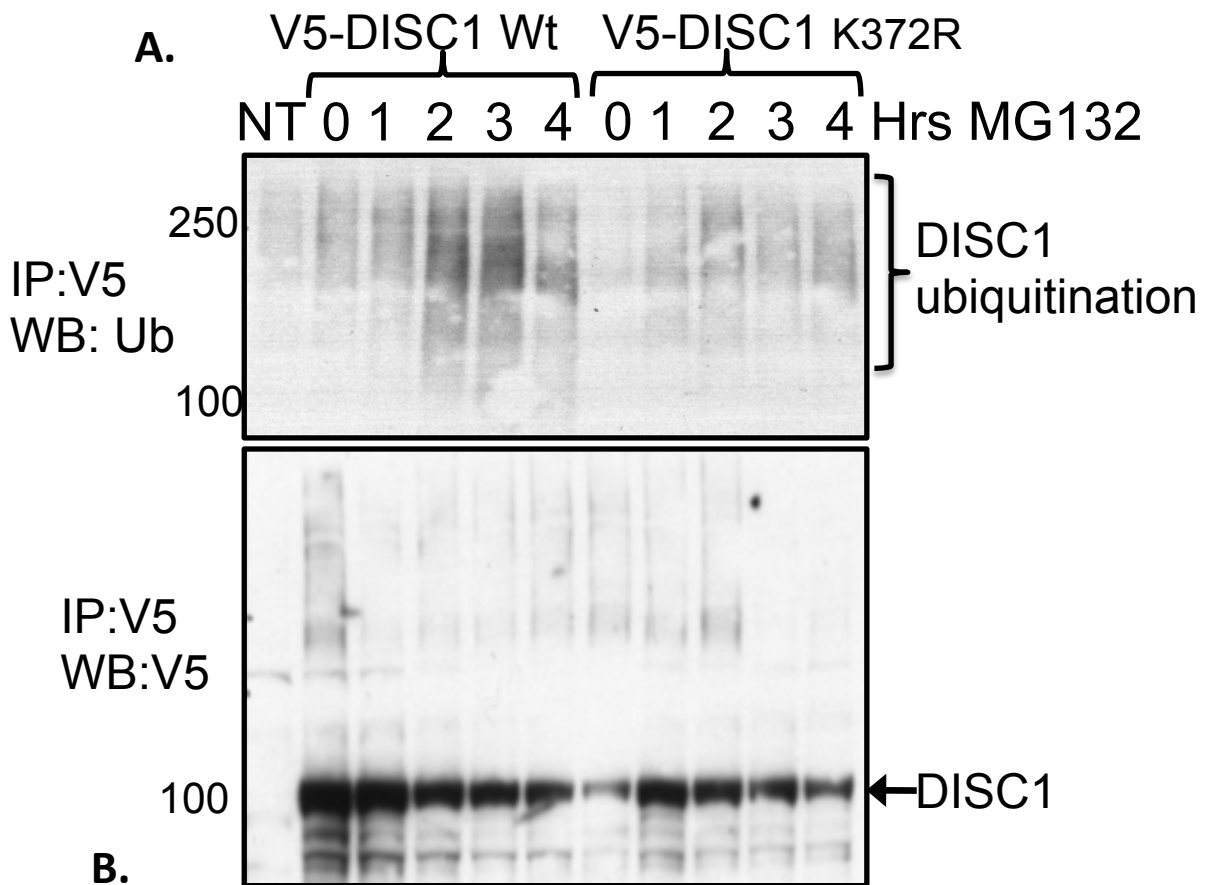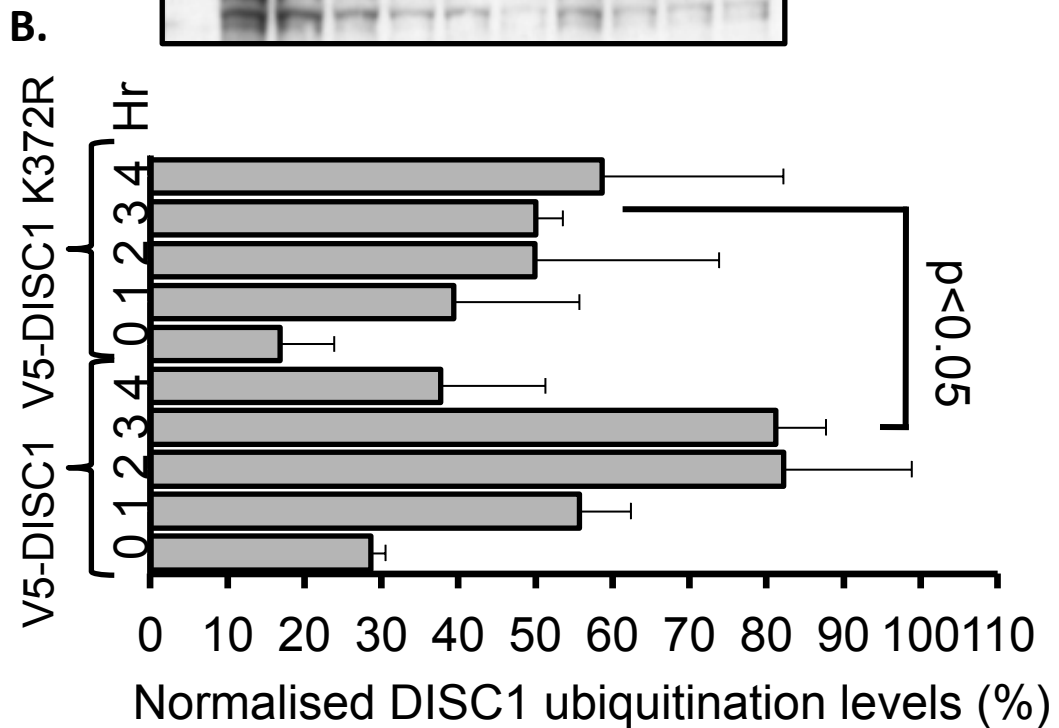

Supplement: mp2017138x2.pdf [file mp2017138x2.pdf]
