# Supplementary material for: FBXW7 regulates DISC1 stability via the ubiquitin-proteosome system
Source: PubMed Central journal article supplement (PMC5984089; doi:10.1038/mp.2017.138), 2017-07-20

**A.**Skp1-Fbw7 with DISC1<sup>197-203/pT198/pS202</sup>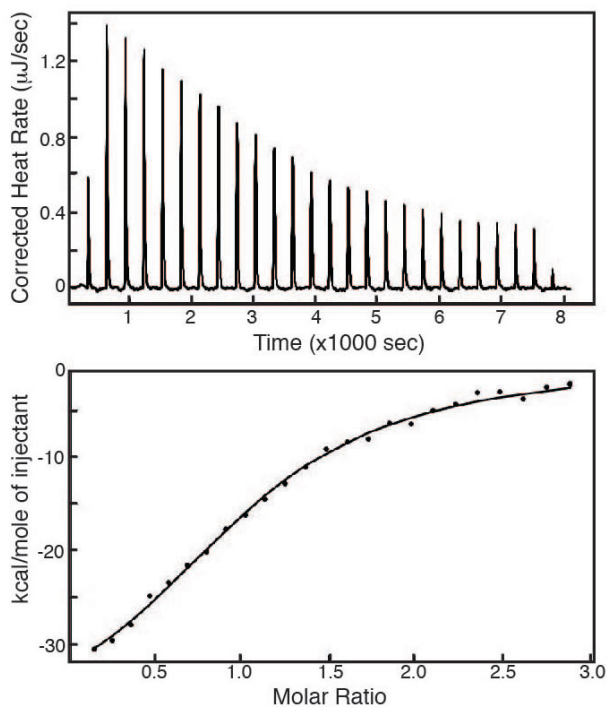**B.**Skp1-Fbw7 with DISC1<sup>193-207/pT198/pS202</sup>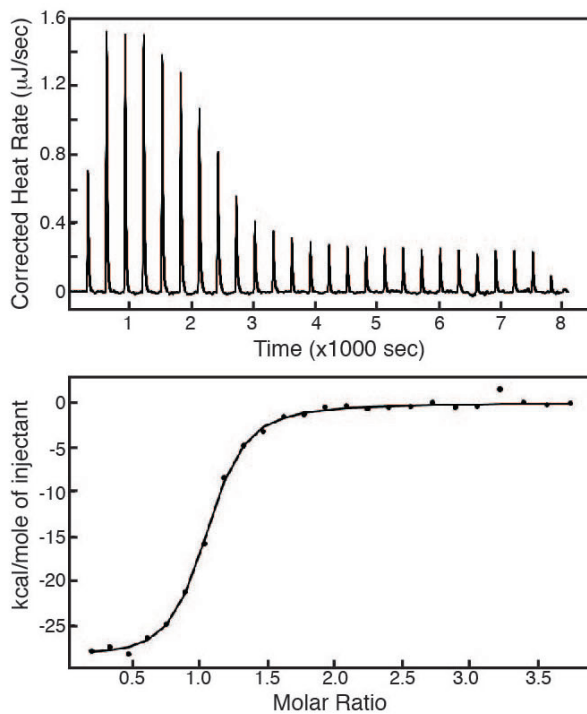**C.**Skp1-Fbw7 with DISC1<sup>193-207/pT198</sup>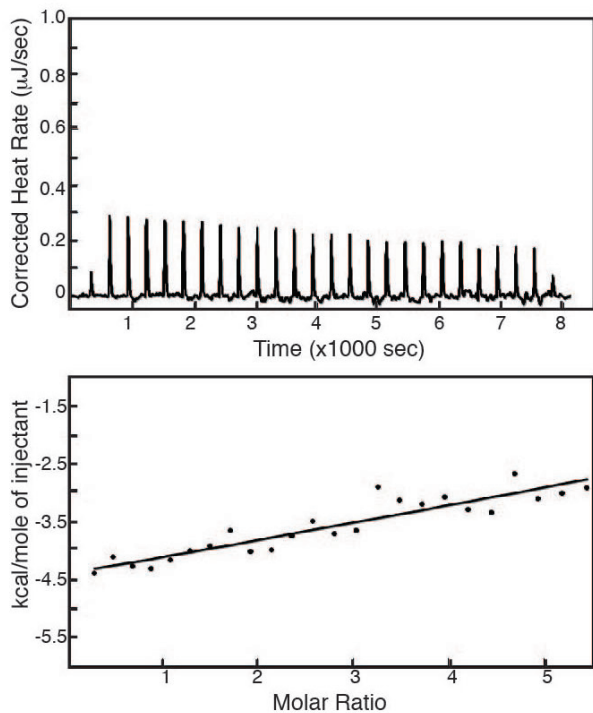**D.**Skp1-Fbw7 with DISC1<sup>193-207/pS202</sup>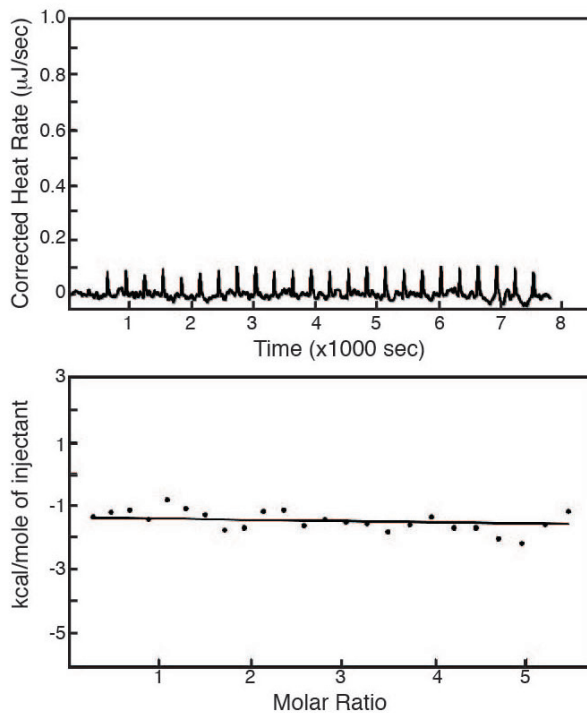

Supplement: mp2017138x5.pdf [file mp2017138x5.pdf]
