# Supplementary material for: FBXW7 regulates DISC1 stability via the ubiquitin-proteosome system
Source: PubMed Central journal article supplement (PMC5984089; doi:10.1038/mp.2017.138), 2017-07-20
Supplement: mp2017138x6.pdf [file mp2017138x6.pdf]

|                                      |                      |
|--------------------------------------|----------------------|
| Data collection                      | Skp1-Fbw7-DISC1      |
| Space group                          | I4,22                |
| Cell dimensions (Å)                  |                      |
| <i>a, b, c</i> (Å)                   | 233.5, 233.5, 108.4  |
| Resolution (Å)                       | 50.0-2.6 (2.64-2.60) |
| R <sub>sym</sub>                     | 10.3 (60.5)          |
| I/σ(I)                               | 15.9 (2.7)           |
| Completeness (%)                     | 99.8 (99.4)          |
| Redundancy                           | 6.1 (5.7)            |
| Refinement                           |                      |
| Resolution (Å)                       | 42.9–2.6             |
| No. of reflections                   | 43,643               |
| R <sub>work</sub> /R <sub>free</sub> | 18.4/21.9            |
| Total protein atoms                  | 4,692                |
| Water molecules                      | 197                  |
| R.m.s deviations                     |                      |
| Bond lengths (Å)                     | 0.015                |
| Bond angles (°)                      | 1.8                  |
