# Supplementary material for: FBXW7 regulates DISC1 stability via the ubiquitin-proteosome system
Source: PubMed Central journal article supplement (PMC5984089; doi:10.1038/mp.2017.138), 2017-07-20
Supplement: mp2017138x7.pdf [file mp2017138x7.pdf]

**A**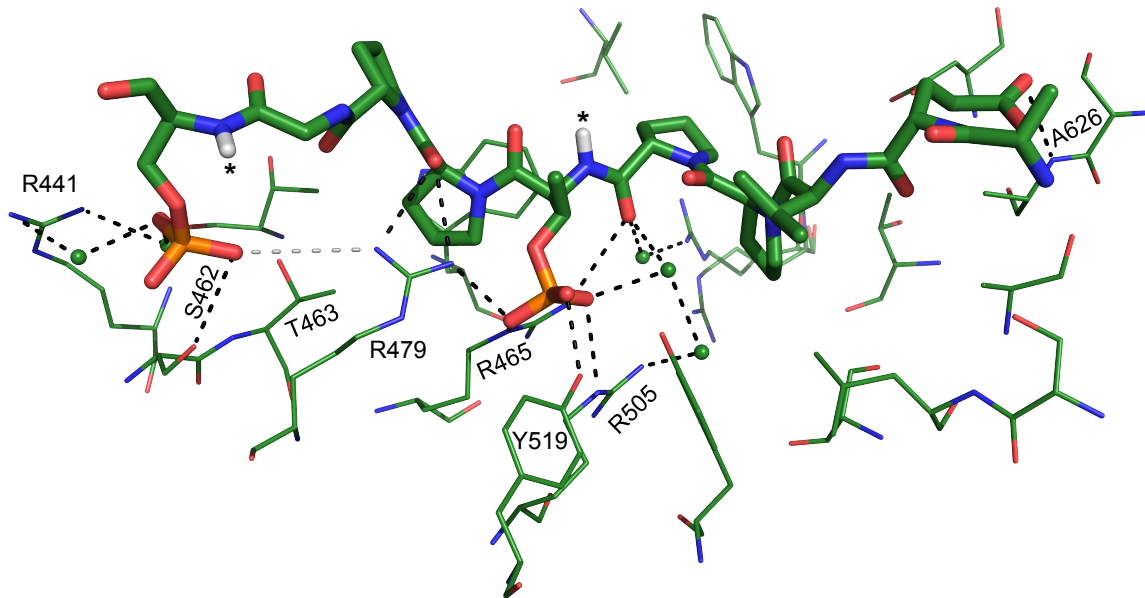**B**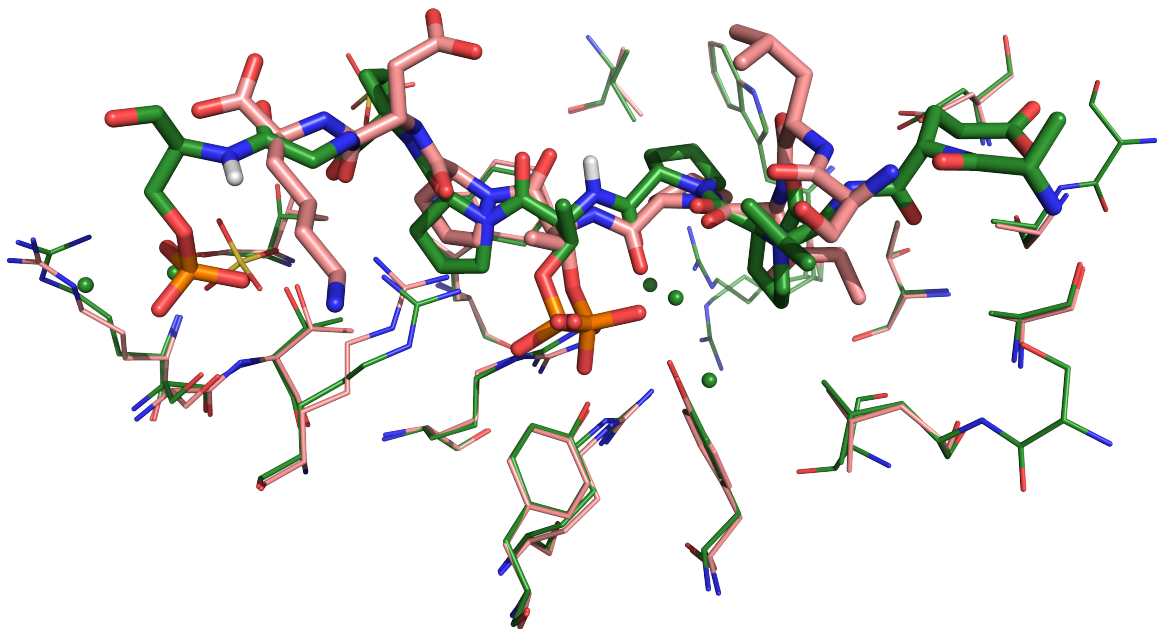**C**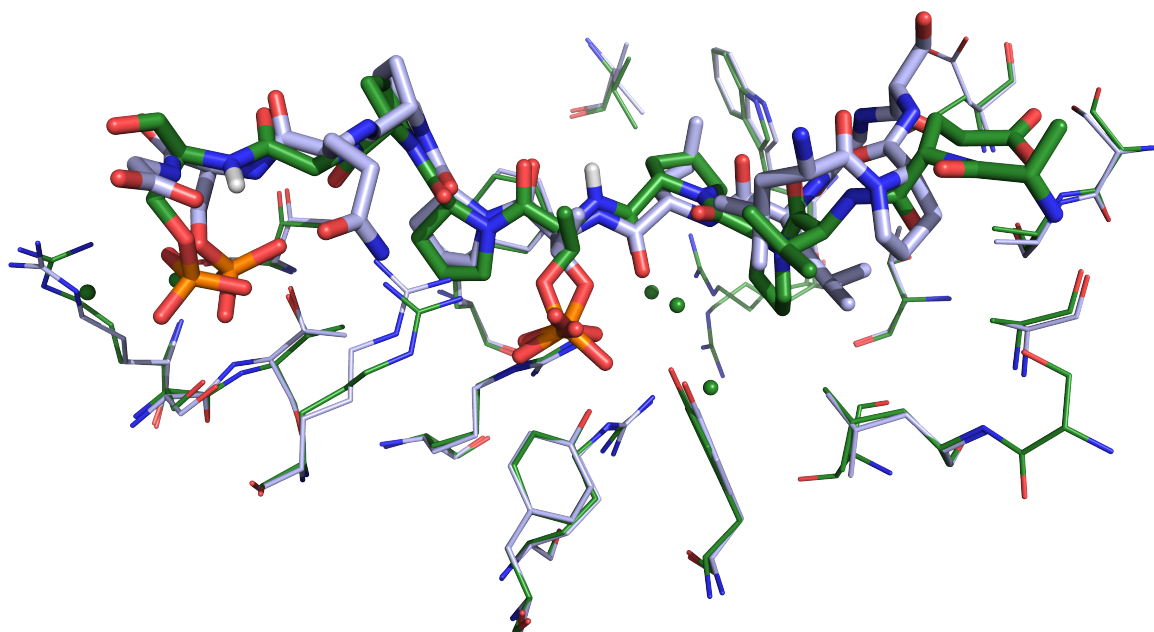

PHOSPHODEGRON SEQUENCES:

|     |             |             |           |     |                |
|-----|-------------|-------------|-----------|-----|----------------|
| 192 | G P E V P P | pT P P G pS | H S A F T | 207 | DISC1          |
| 071 | P C S L I P | pT P D K E  | D D D R V | 086 | cyclin E N-ter |
| 389 | L P S G L L | pT P P Q pS | G K K Q S | 404 | cyclin E C-ter |
