# Supplementary material for: FBXW7 regulates DISC1 stability via the ubiquitin-proteosome system
Source: PubMed Central journal article supplement (PMC5984089; doi:10.1038/mp.2017.138), 2017-07-20

**A** Fo-Fc map, 3.0  $\sigma$

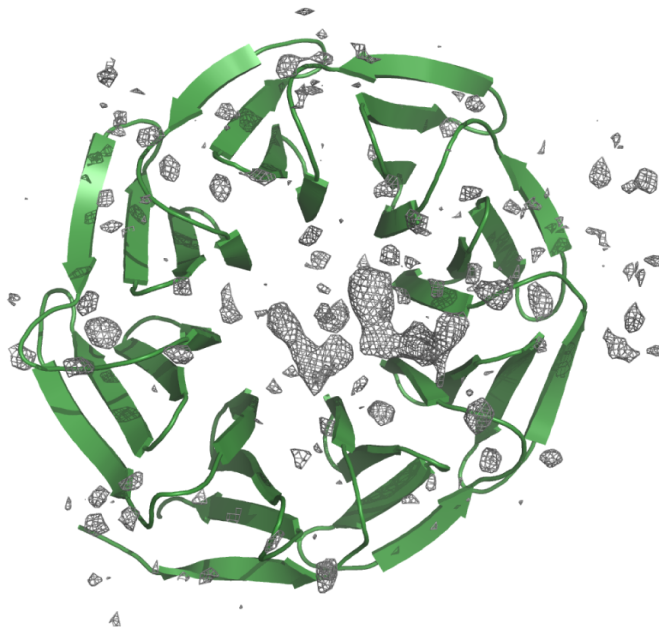

**B** 2Fo-Fc map, 1.0  $\sigma$

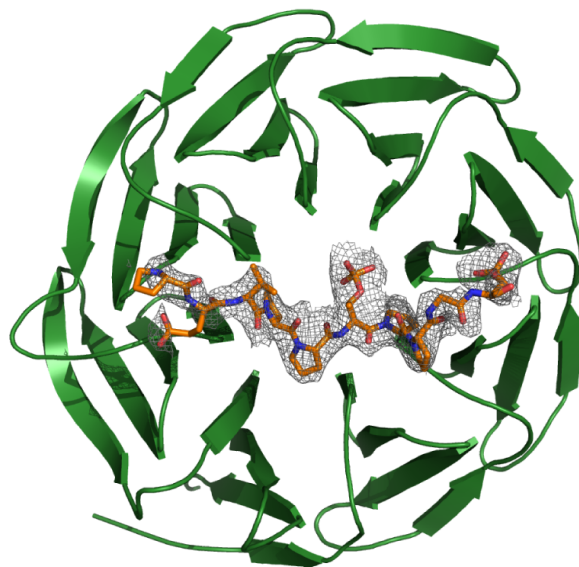

Supplement: mp2017138x8.pdf [file mp2017138x8.pdf]
