# Supplementary material for: FBXW7 regulates DISC1 stability via the ubiquitin-proteosome system
Source: PubMed Central journal article supplement (PMC5984089; doi:10.1038/mp.2017.138), 2017-07-20
Supplement: mp2017138x9.pdf [file mp2017138x9.pdf]

A. HEK293 cells

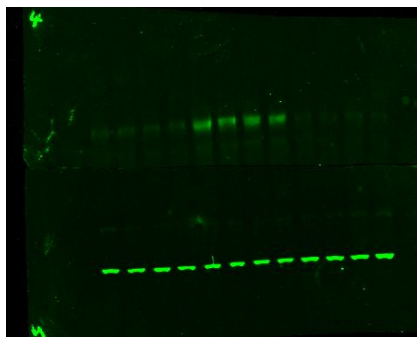

100kDa-  
DISC1

37kDa-  
GADPH

B. Neural progenitors derived from iPS cells.

B.

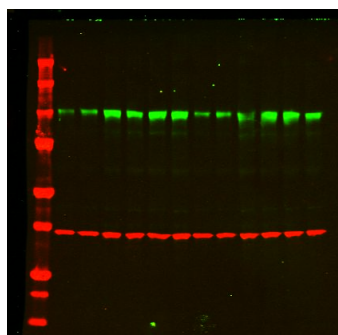

100kDa-  
DISC1

37kDa-  
GADPH

Input: (1/10th IP)

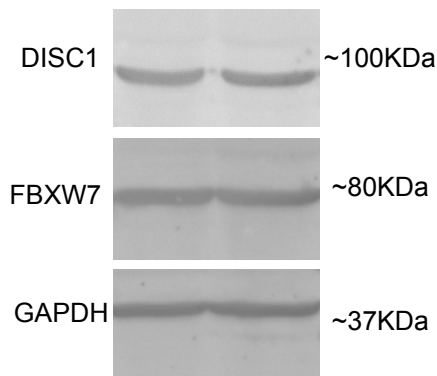

C.

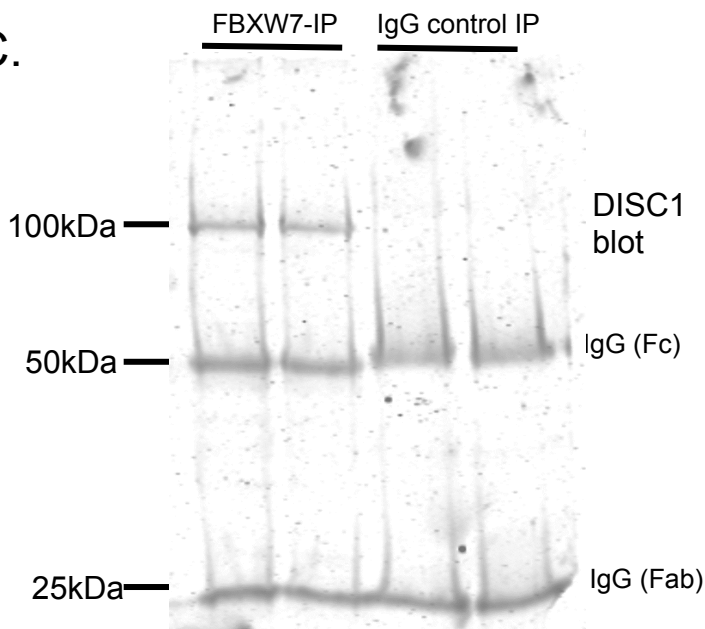

MG132 timecourse

D. 0 0.5 1 2 (Hrs)

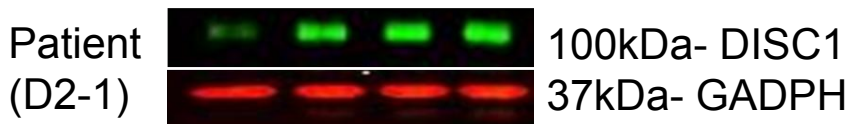

E.

No Kinase

GSK3B

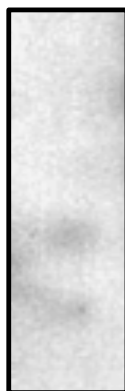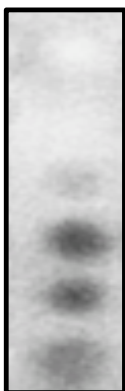

171VRAAGSLPSAELSSNSCSPGCGPEV<sup>195</sup>

176SLPSAELSSNSCSPGCEVPPT**TPP**<sup>200</sup>

181ELSSNSCSPGCGPEVPPT**TPPGSHSA**<sup>205</sup>

186SCSPGCGPEVPPT**TPPGSHSAFTSSSF**<sup>210</sup>

191CGPEVPPT**TPPGSHSAFTSSFSFIRL**<sup>215</sup>

196PPT**TPPGSHSAFTSSFSFIRLSLGSA**<sup>220</sup>
